# Supplementary material
Source: PubMed Central journal article supplement (PMC6629582)

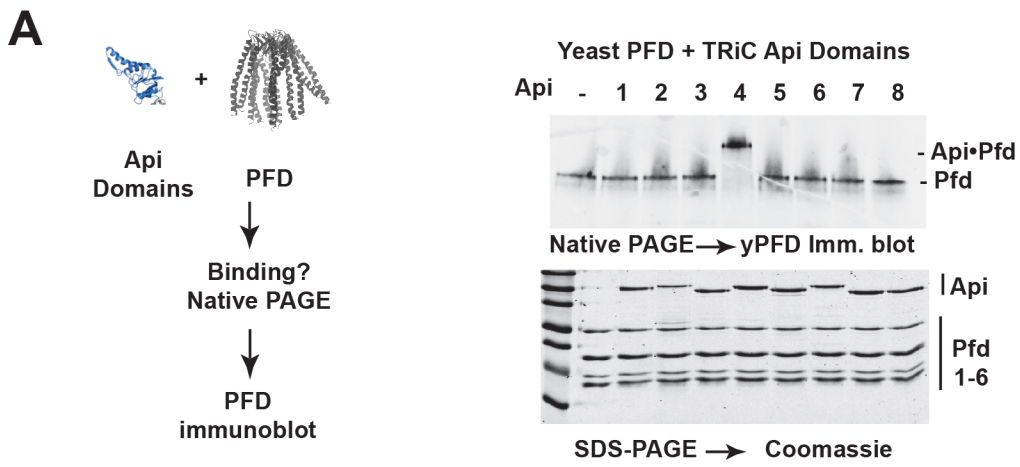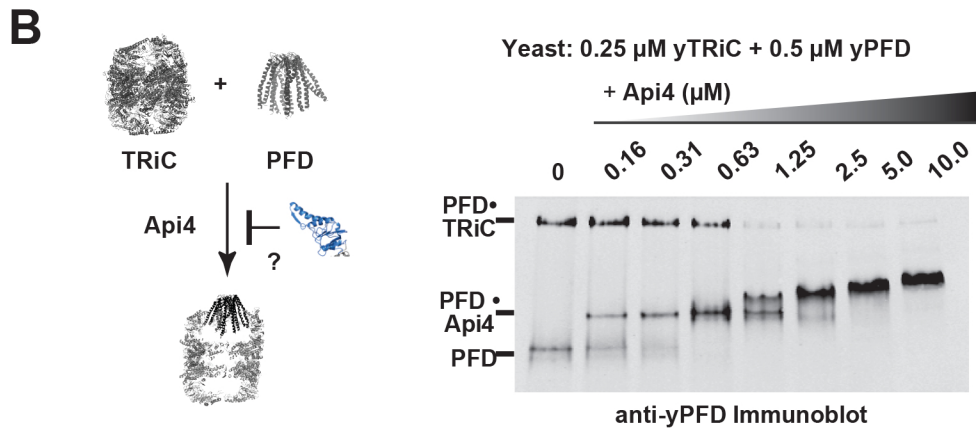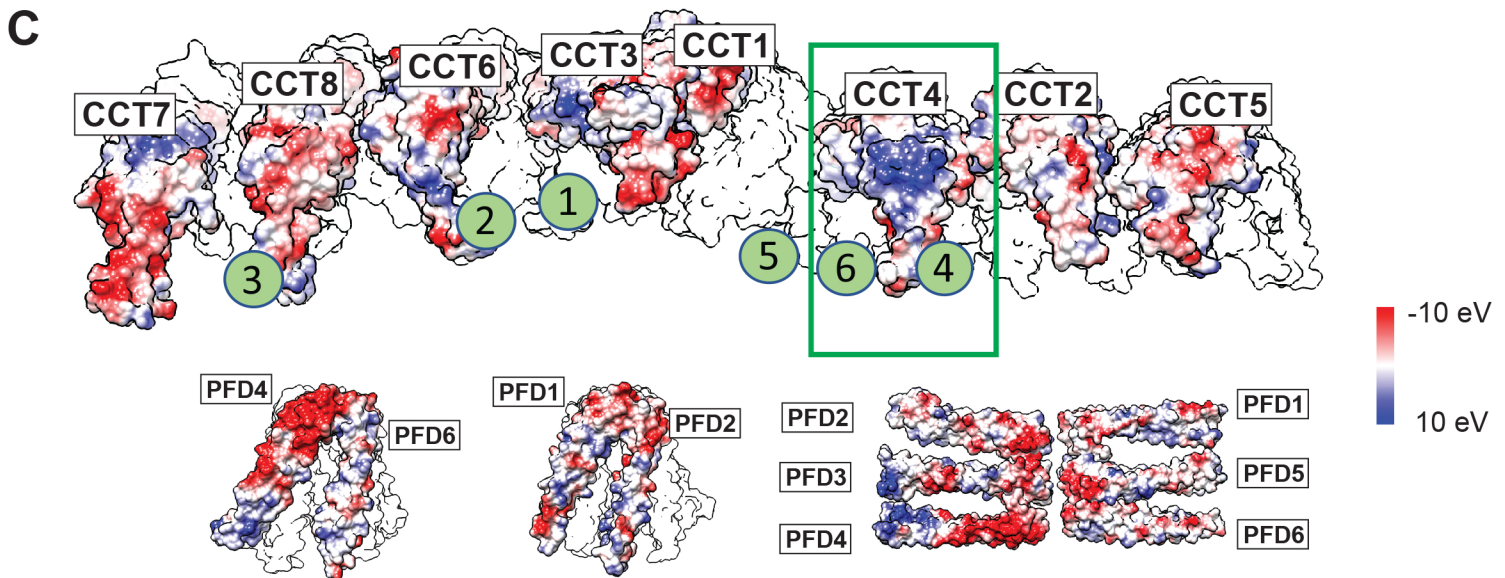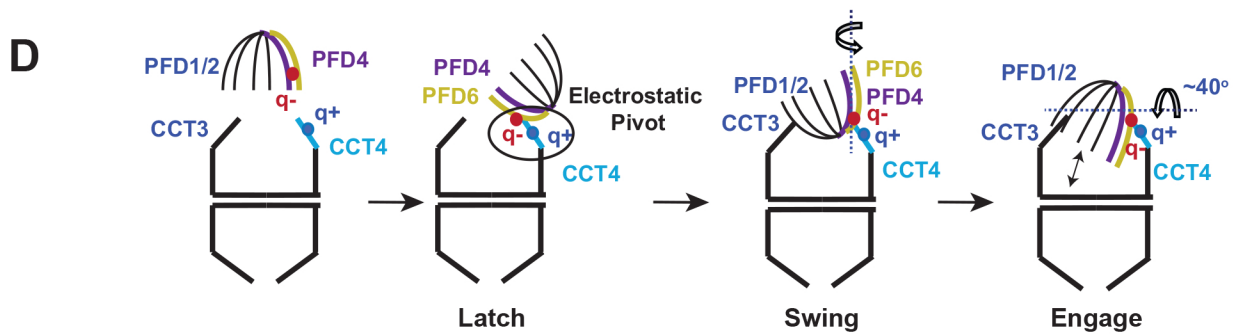

Supplement: NIHMS1525271-supplement-6.pdf [file NIHMS1525271-supplement-6.pdf]
